# Supplementary material for: Specific microbiome-dependent mechanisms underlie the energy harvest efficiency of ruminants
Source: PubMed Central journal article supplement — ISME J. 2016 May 6;10(12):2958–72. doi: 10.1038/ismej.2016.62 (PMC5148187; doi:10.1038/ismej.2016.62), 2016-05-06
Supplement: ismej201662x1.pdf [file ismej201662x1.pdf]

## 1 **Supplementary figure legends**

2 **Figure S1** RFI Population Distribution of the Trial Cohort (146 Cows). Cows with  
3 extreme low (n = 40) and extreme high (n = 38) RFI, are colored red and grey,  
4 respectively and represent the 25% most and 25% least efficient from a cohort of 146  
5 cows. These 78 cows were chosen for rumen and fecal sampling.

6

7 **Figure S2** Percentage of Mapped Reads From Efficient and Inefficient Cows'  
8 Samples to the Total Microbiome Genes.

9 Data are expressed as mean  $\pm$  SEM.

10

11 **Figure S3** Number of Genes in a Sample As a Function of the Number of Reads.

12 Reads from each sample were aligned to the total genes. The number of aligned reads  
13 is plotted against the number of genes obtained for each sample. No correlation was  
14 found between the two variables.

15

16 **Figure S4** Phyla Abundances. Microbiome composition of the two efficiency groups  
17 at the phylum level. Phyla with relative abundance above 0.001% are presented.

18 Data are expressed as mean  $\pm$  SEM.

19

20 **Figure S5** Shannon Diversity and Dominance of Efficient and Inefficient  
21 Microbiomes. (a) Shannon diversity at different phylogenetic levels. (b) Dominance  
22 at different phylogenetic levels.

23 Data are expressed as mean  $\pm$  SEM. Wilcoxon rank sum, \* $P < 0.05$ .

24

25 **Figure S6** Prediction of Physiological and Metabolic Traits According to Species.  
26 Species that differed in abundance between efficient and inefficient cows were sorted  
27 according to their *P*-values and grouped into bins of 100. The bins were used as  
28 predictive features for the different physiological parameters using the k-Nearest  
29 Neighbors (KNN) algorithm with  $k = 3$ . Each iteration used a different bin as  
30 predictive features, in ascending *P*-value order. (a) Conversion ratio (CR) prediction  
31 accuracy. (b) Milk fat prediction accuracy. (c) Dry matter intake (DMI) prediction  
32 accuracy. (d) Milk yield prediction accuracy. (e) Milk lactose prediction accuracy. (f)  
33 pH prediction accuracy. (g) Milk protein prediction accuracy. (h) Milk energy  
34 prediction accuracy. (i) Body conditioning score (BCS) change prediction accuracy.  
35

36 **Figure S7** Prediction of Physiological and Metabolic Traits According to Genes.  
37 Genes that differed in abundance between efficient and inefficient cows were sorted  
38 according to their *P*-values and grouped into bins of 100. The bins were used as  
39 predictive features for the different physiological parameters using the k-Nearest  
40 Neighbors (KNN) algorithm with  $k = 3$ . Each iteration used a different bin as  
41 predictive features, in ascending *P*-value order. Different graphs represent predictions  
42 of different physiological parameters. (a) CR prediction accuracy. (b) Milk fat  
43 prediction accuracy. (c) DMI prediction accuracy. (d) Milk yield prediction accuracy.  
44 (e) Milk lactose prediction accuracy. (f) pH prediction accuracy. (g) Milk protein  
45 prediction accuracy. (h) Milk energy prediction accuracy. (i) BCS change prediction  
46 accuracy.

47

48 **Figure S8** Specificity and Sensitivity Evaluation of Predictions of Physiological and  
49 Metabolic Traits According to Species. Receiver Operation Characteristics (ROC)

50 curves and Area Under Curve (AUC) measures were obtained for the first five  
51 prediction bins (see Fig. 2a, Supplementary Fig. 4) based on the average of 1,000  
52 KNN cross-validation iterations. (a) CR ROC analysis. (b) Milk fat ROC analysis. (c)  
53 DMI ROC analysis. (d) Milk yield ROC analysis. (e) Milk lactose ROC analysis. (f)  
54 pH ROC analysis. (g) Milk protein ROC analysis. (h) Milk energy ROC analysis. (i)  
55 BCS change ROC analysis.

56

57 **Figure S9** Specificity and Sensitivity Evaluation of Predictions of Physiological and  
58 Metabolic Traits According to Genes. Receiver Operation Characteristics (ROC)  
59 curves and Area Under Curve (AUC) measures were obtained for the first five  
60 prediction bins (see Fig. 2b, Supplementary Fig. 5) based on the average of 1,000  
61 KNN cross-validation iterations. (a) CR ROC analysis. (b) Milk fat ROC analysis. (c)  
62 DMI ROC analysis. (d) Milk yield ROC analysis. (e) Milk lactose ROC analysis. (f)  
63 pH ROC analysis. (g) Milk protein ROC analysis. (h) Milk energy ROC analysis. (i)  
64 BCS change ROC analysis.

65

66 **Figure S10** In-Vitro Digestibility and In Vivo Digestibility. (a) In-vitro dry matter  
67 (DM) digestibility of feed after 24 h incubation with rumen fluid of efficient and  
68 inefficient cows. (b) In-vitro neutral detergent fiber (NDF) digestibility of feed after  
69 24 h incubation with rumen fluid of efficient and inefficient cows. (c) In-vivo DM  
70 digestibility of efficient and inefficient stool samples. (d) In-vivo NDF digestibility of  
71 efficient and inefficient stool samples.

72 Data are expressed as mean  $\pm$  SEM.

73

74 **Figure S11** Relative Abundance of Significantly Different Species. Relative  
75 abundance of the 18 species that were found to be significantly different between the  
76 two efficiency groups.

77 Data are expressed as mean  $\pm$  SEM.

78

79 **Figure S12** Principal Coordinates Analysis (PCoA) of Genes Enriched in the Two  
80 Efficiency Groups – PCoA was performed for the efficient and inefficient cows'  
81 microbiomes using the 34,166 genes that were significantly different between the two  
82 efficiency groups.

83

84 **Figure S13** End Product Compounds of KEGG Annotated Genes Significantly  
85 Enriched in Efficient Cows' Microbiomes. End product compounds resulting from the  
86 overall annotation of the efficient cows' enriched genes are denoted in blue.  
87 Metabolites which were measured in the metabolomics analysis are denoted in green.

88

89 **Figure S14** End Product Compounds of KEGG Annotated Genes Significantly  
90 Enriched in Inefficient Cows' Microbiomes. End product compounds resulting from  
91 the overall annotation of the inefficient cows' enriched genes are denoted in blue.  
92 Metabolites which were measured in the metabolomics analysis are denoted in green.

93

94 **Figure S15** Read Alignment to Known Rumen Microbial Genomes. Reads from each  
95 sample were aligned to sequenced genomes of known rumen microorganisms using  
96 the BWA tool. The ratios between recruitment of efficient/inefficient samples to each  
97 genome are presented.

98 Data are expressed as mean  $\pm$  SEM. Permutations t test, \* $P < 0.05$ , \*\* $P < 0.01$ , \*\*\* $P$   
99  $< 0.001$ .

100

101 **Figure S16** Acrylate Pathway Distribution in Organisms of the Rumen Microbiome.

102 Genes from all samples were blasted against genes of lactoyl-CoA dehydratase

103 subunits alpha, beta and gamma (Reichardt *et al.* 2014). Genes that passed a cutoff of

104 60% identity were gathered and annotated using the NR database. The percentage of

105 each annotation in the overall genes above a threshold of 2% is presented.

106

107

## 108 **Supplementary table legends**

109 **Table S1** EC Numbers of KEGG Metabolic Pathways Enzymes. EC numbers of

110 KEGG metabolic pathways enzymes used for alignment of reads from the different

111 feed efficiency microbiome samples.

112

113 **Table S2** Shannon Diversity and Dominance of Species and Genes of Efficient and

114 Inefficient Cows' Microbiomes.

115 Data are expressed as mean  $\pm$  SEM. Wilcoxon rank sum, \* $P < 0.05$ , \*\* $P < 0.01$ .

116

117 **Table S3** SCFAs Concentrations. Concentrations of SCFAs before and after

118 normalization of total OM. Data are expressed as mean  $\pm$  SEM. <sup>a, b</sup> Means within a

119 row with different superscript letters are significantly different ( $P < 0.05$ ).

120

121 **Table S4** ko Numbers of Amino Acid Metabolism Category Enriched in Inefficient

122 Cows' Microbiomes.

## 123 **Supplementary Data legends**

124 **Data 1** Tukey's Test Analysis of RFI of the Trial Cohort (146 cows). Cows with  
125 extreme low (n = 40) and extreme high (n = 38) RFI values that are significantly  
126 different from each other ( $P < 0.05$ ) are denoted in red and grey, respectively, and  
127 represent the 25% most and 25% least efficient animals of the cohort which were  
128 chosen for further analysis. Letters or signs represent groups of animals which are not  
129 significantly different in their RFI value.

130

131 **Data 2** Relative Abundances at Different Phylogenetic Levels. Relative abundances  
132 of taxa in the two efficiency groups according to 16S data. Species were binned at  
133 different taxonomic levels to receive taxon abundances for each phylogenetic level.  
134 Data are expressed as mean  $\pm$  SEM.

135

136 **Data 3** Prediction Accuracy of Different Bin Sizes. Bins with different number of  
137 features ranging from 50 to 500 and covering the first 1,000 Fisher's exact test  
138 significant features, were used to predict the RFI phenotype. Kruskal-Wallis test was  
139 used to determine if bin size significantly affects prediction accuracy.

140

141 **Data 4** Measured Physiological Parameters for Each Animal Sampled.

142

143 **Data 5** Taxonomic Annotation of Species in the First Five RFI Predictive Bins.

144

145 **Data 6** Functional Annotation of Genes in the First Five RFI Predictive Bins. Genes  
146 in the first five RFI predictive bins were annotated using the NR and GO databases.  
147 Sequences description and Gene-Ontology-Terms are presented.

148 **Data 7** Genes Significantly Enriched in Efficient or Inefficient Cows' Microbiomes.  
149 Genes that were found to be significantly enriched in the microbiomes of one of the  
150 efficiency groups are listed, along with their abundances in each group (mean  $\pm$   
151 SEM), E.C. number and KEGG Orthology. The  $r$  and  $P$ -values of Spearman  
152 correlation of each gene to the RFI phenotype are also presented.  $P$ -values were  
153 corrected for false discovery rate.

154

155 **Data 8** ko Annotations of Genes Significantly Enriched in Efficient or Inefficient  
156 Cows' Microbiomes. The pathway names and ko numbers of each gene enriched in  
157 efficient or inefficient cows are listed.

158

159 **Data 9** End Product Compounds of KEGG Annotated Genes Significantly Enriched  
160 in Efficient or Inefficient Cows' Microbiomes. The end product compounds resulting  
161 from the overall annotation of the efficient cows' enriched genes or the inefficient  
162 cows' enriched genes are listed.

163

164 **Figure S1**

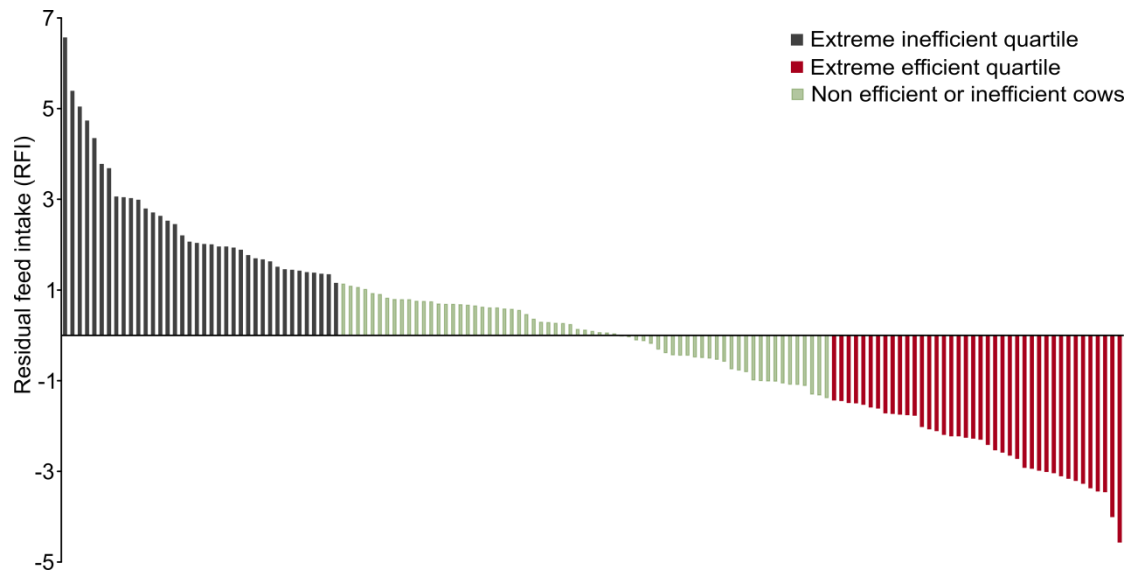

165

166



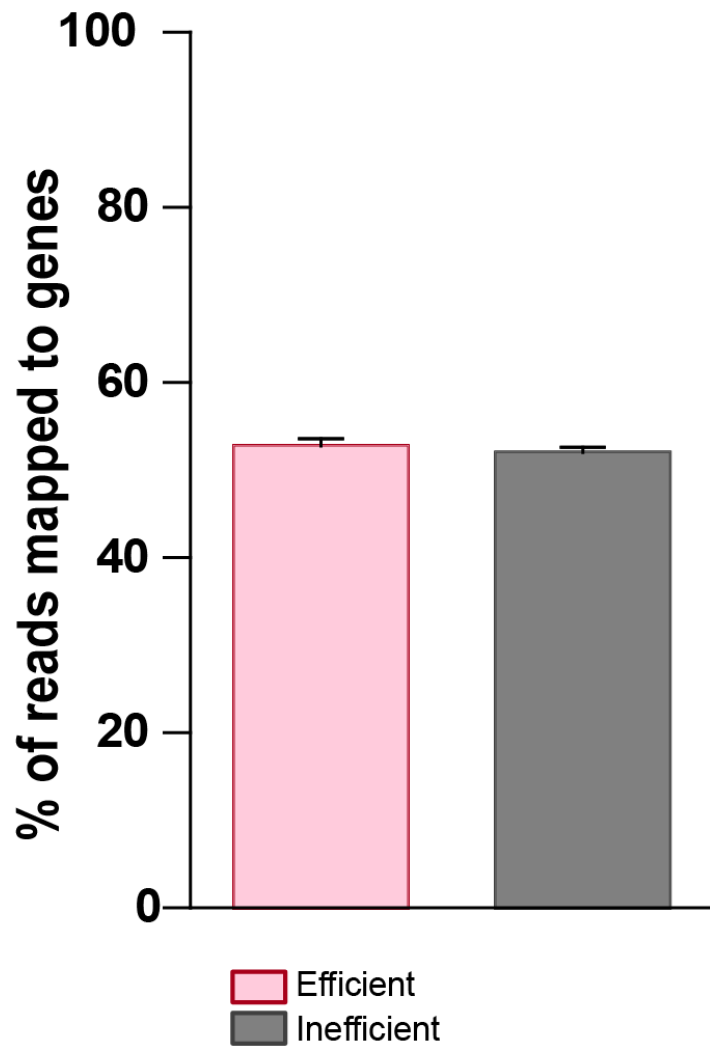

168

169

170

171

172 **Figure S3**

173

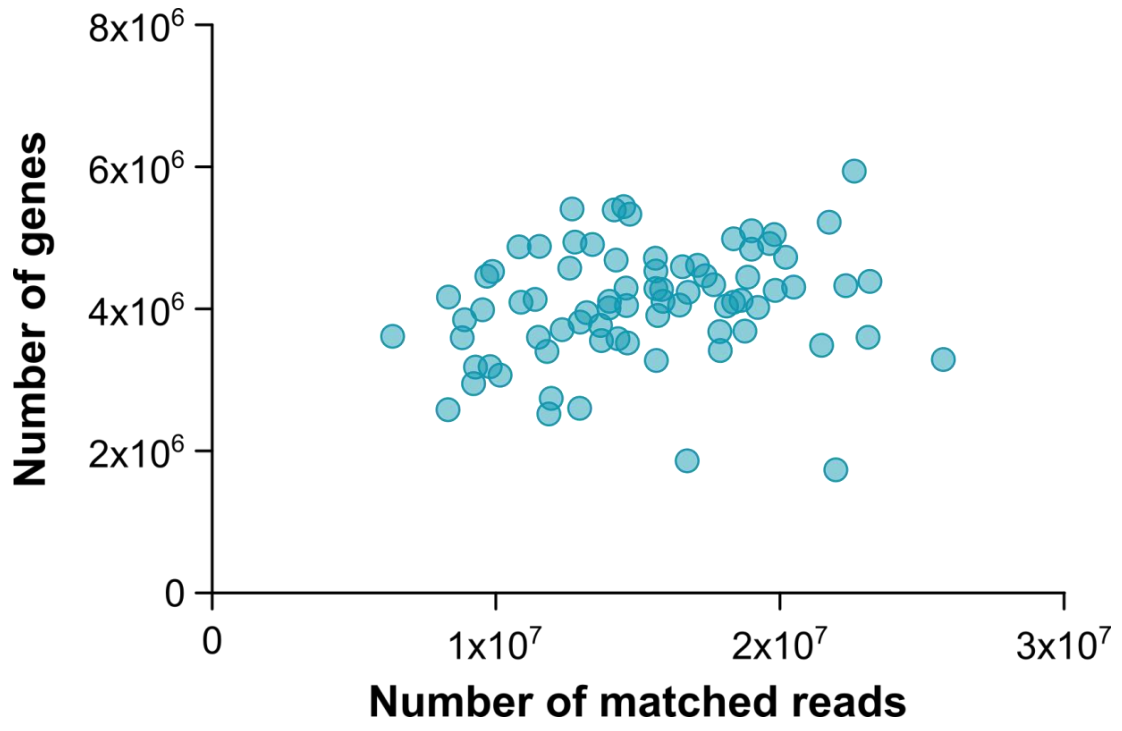

174

175 **Figure S4**

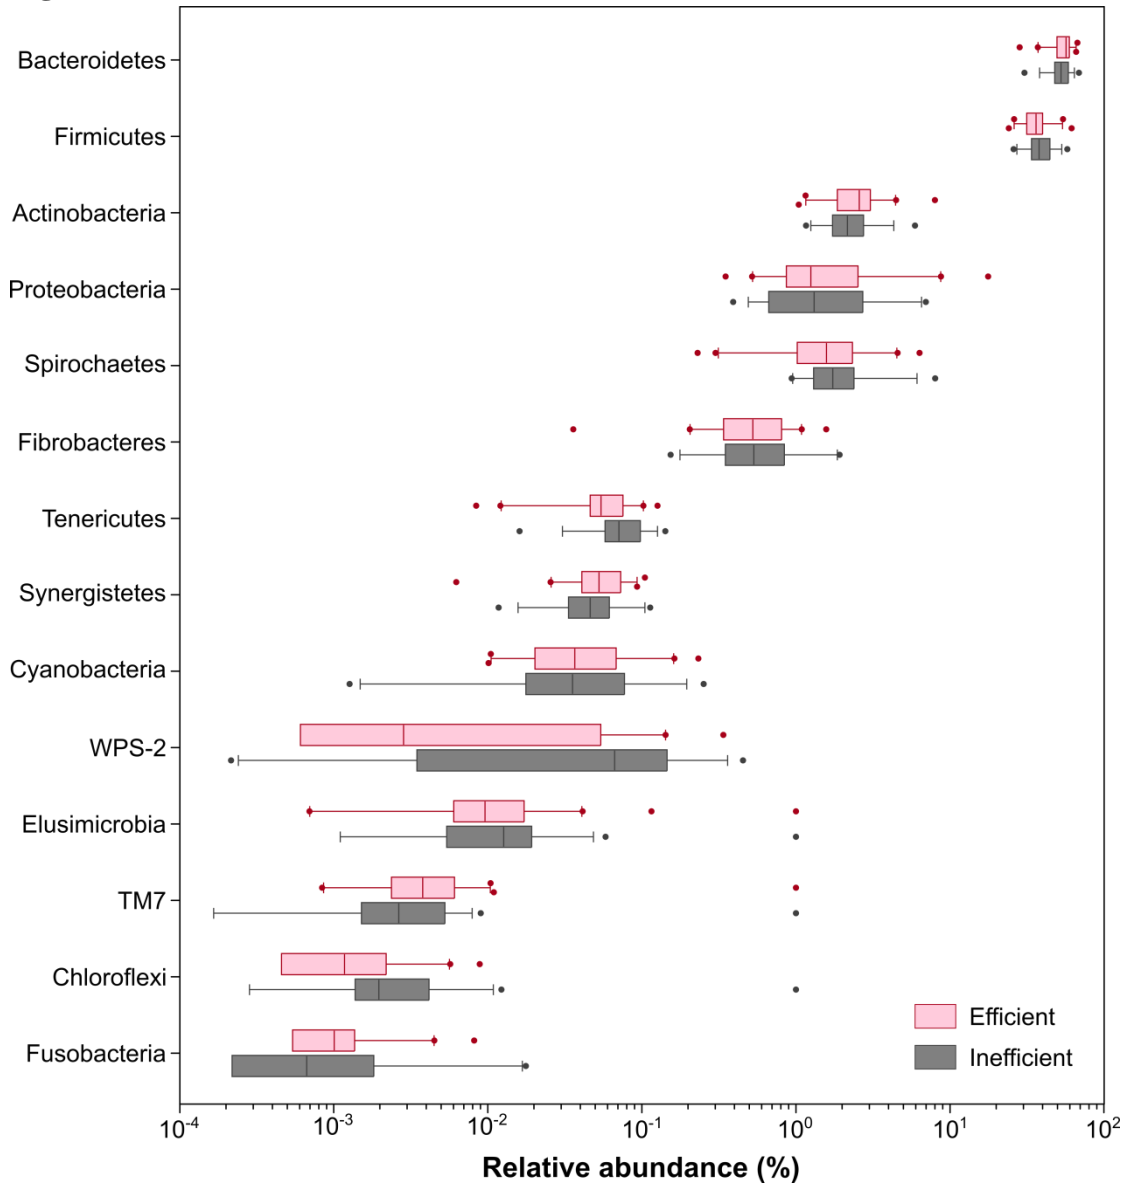

176

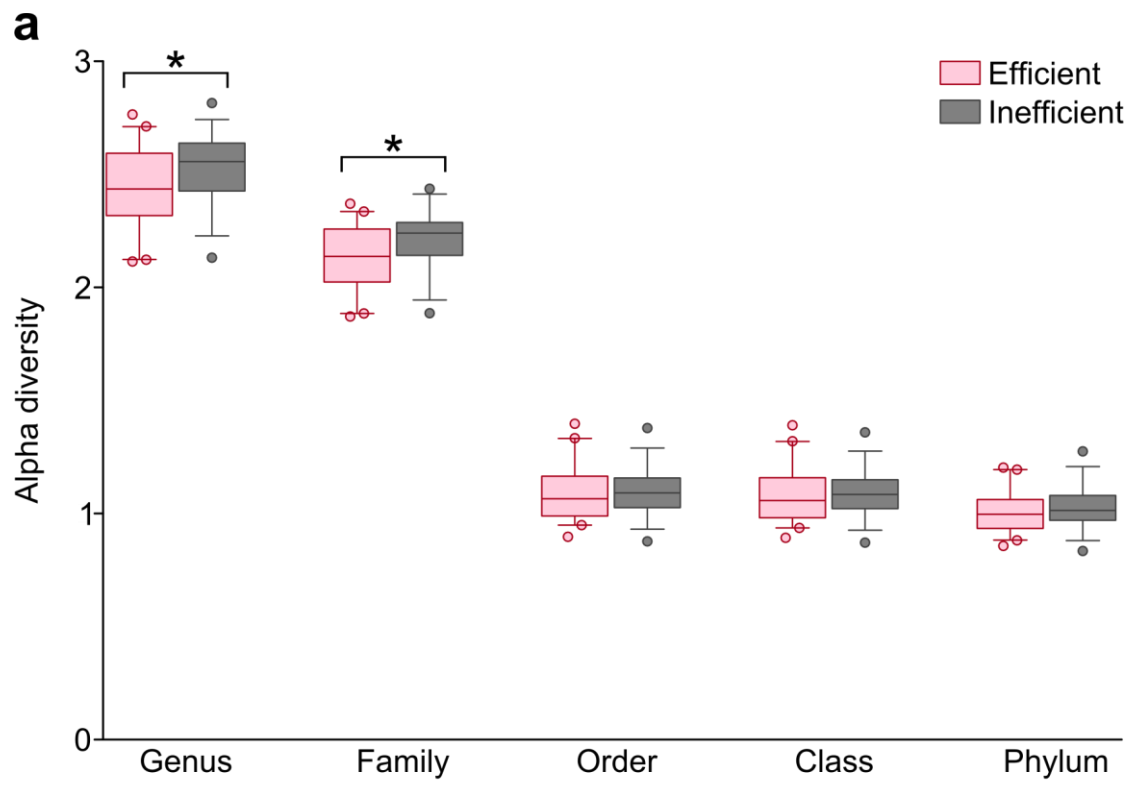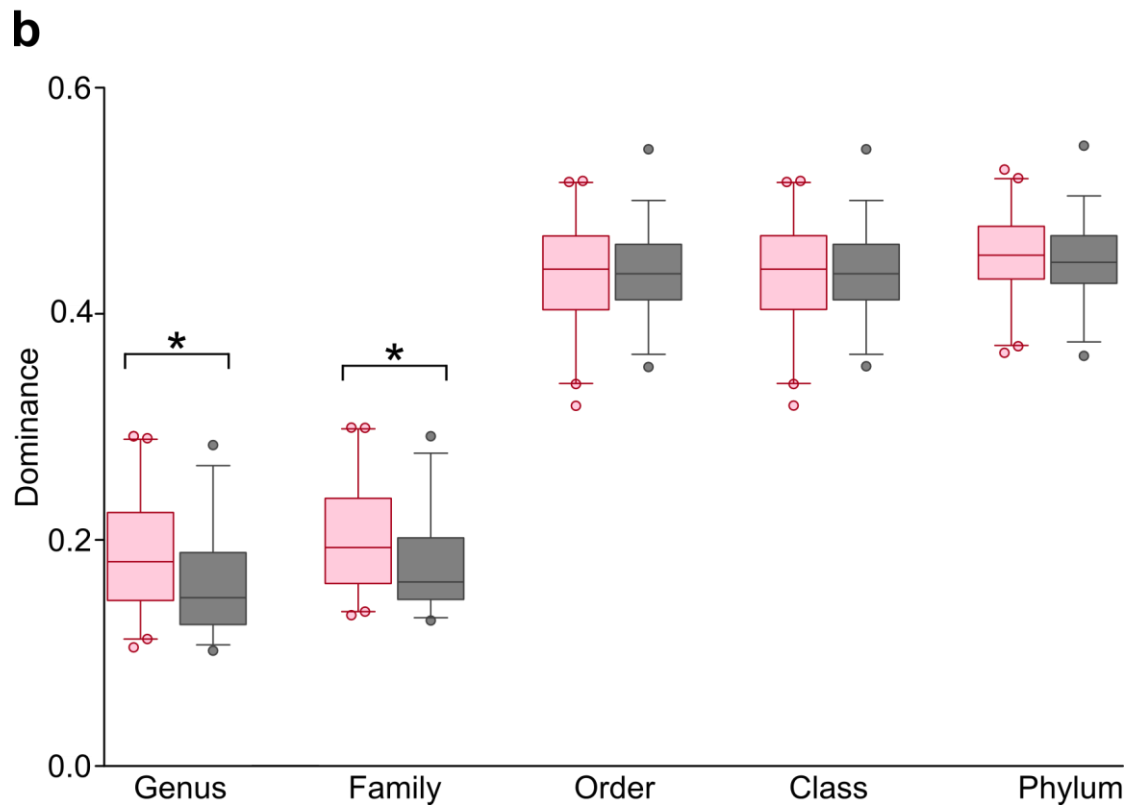

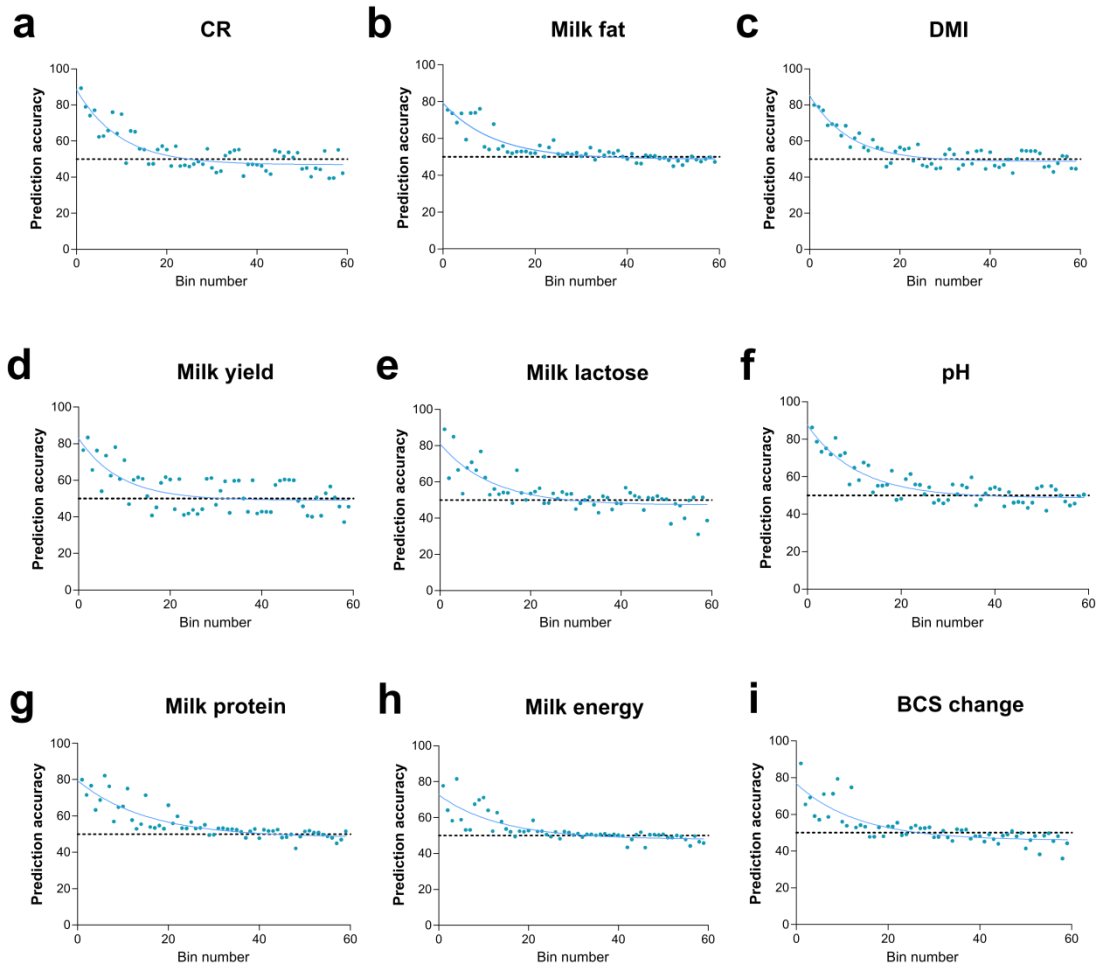

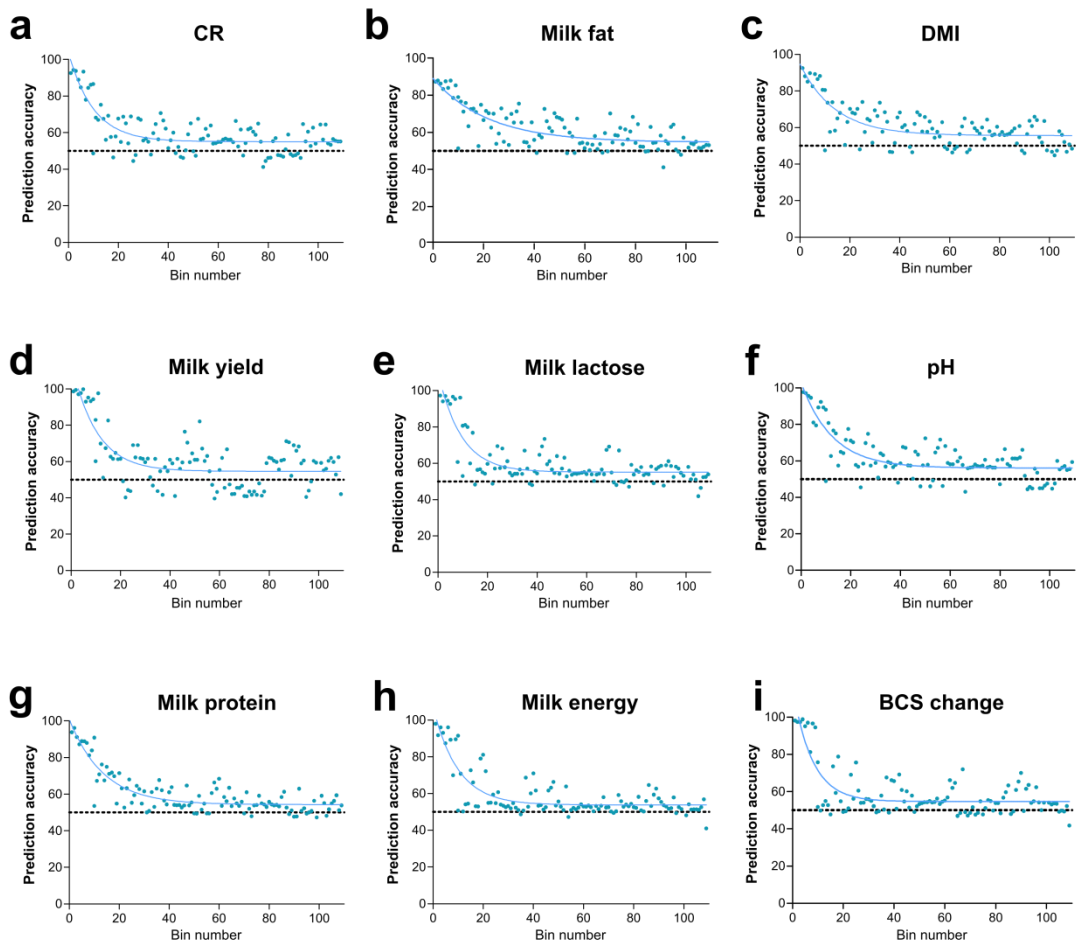

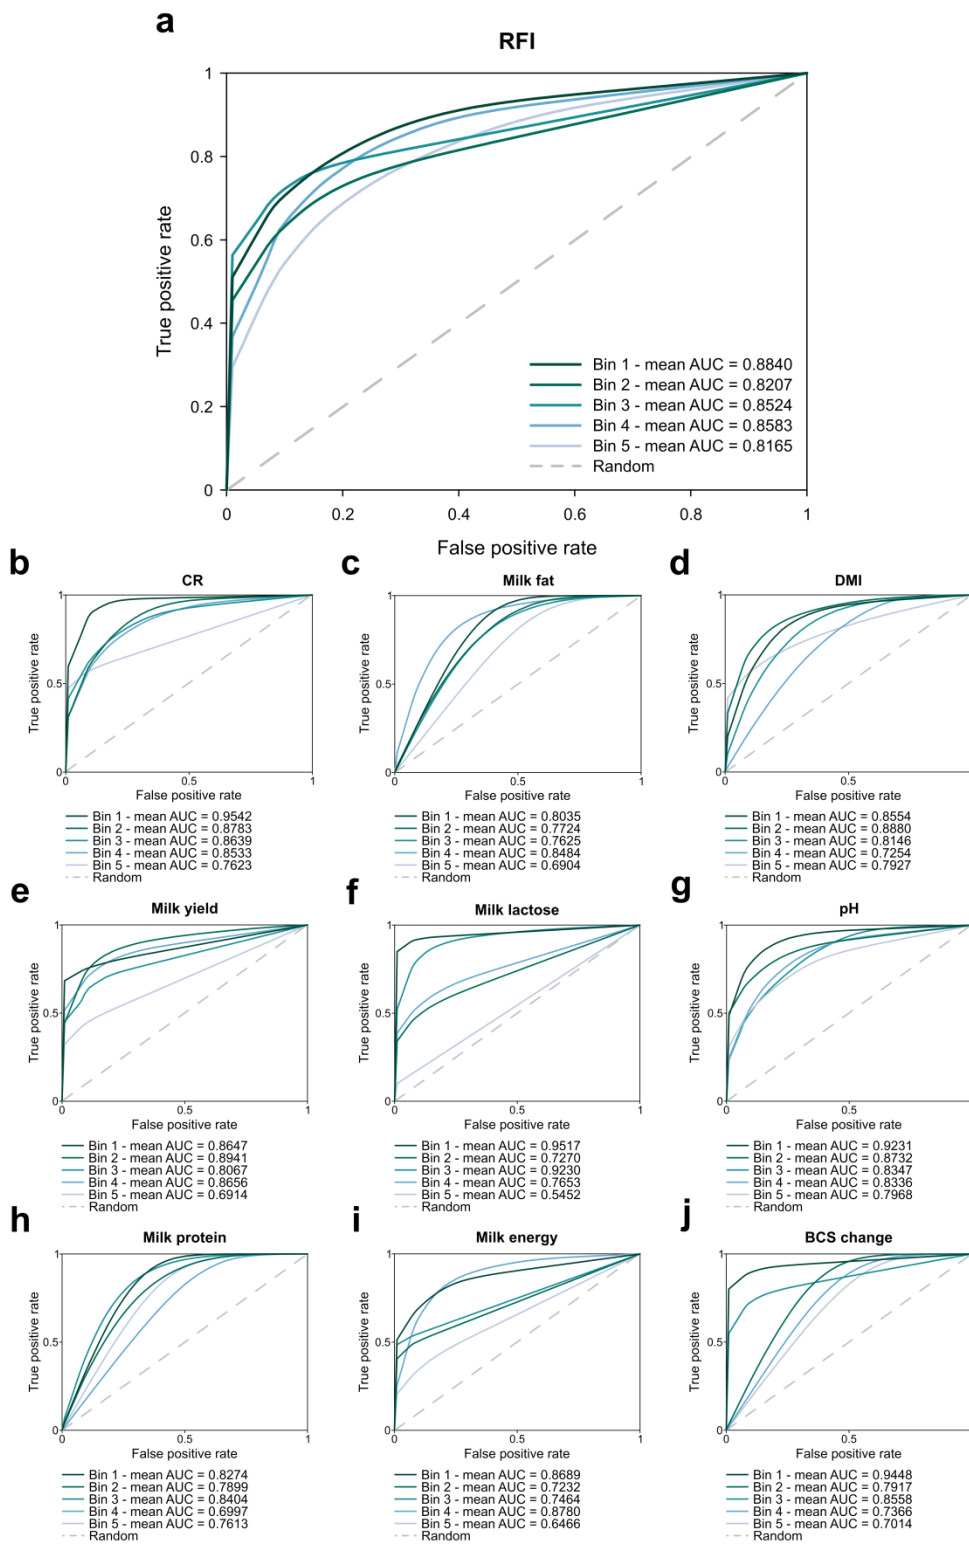

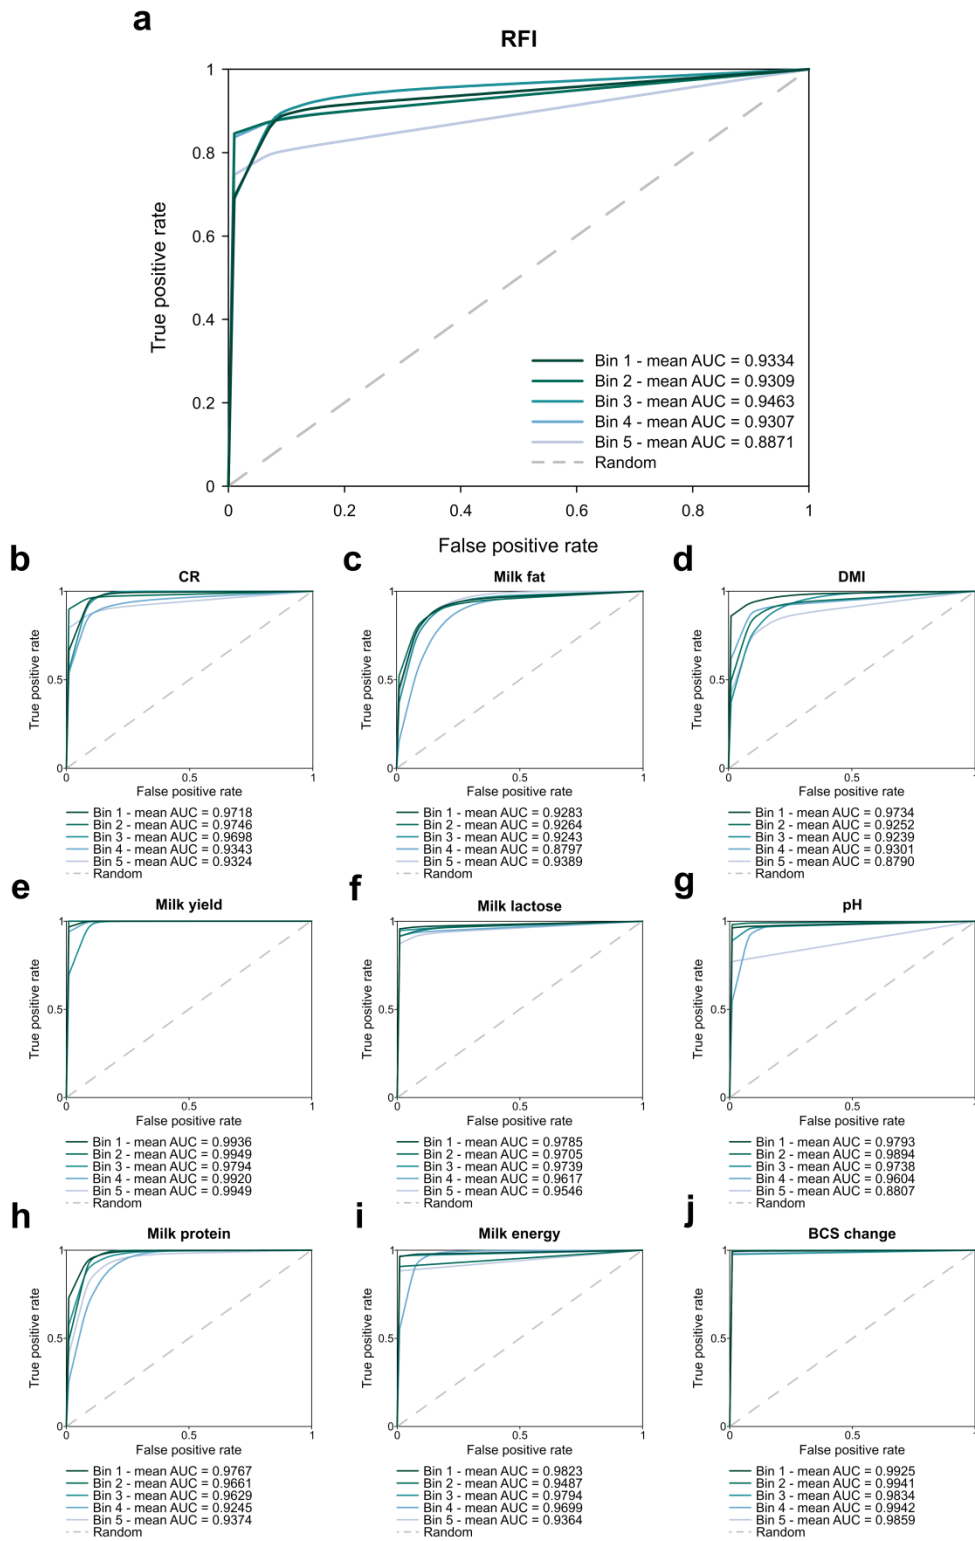



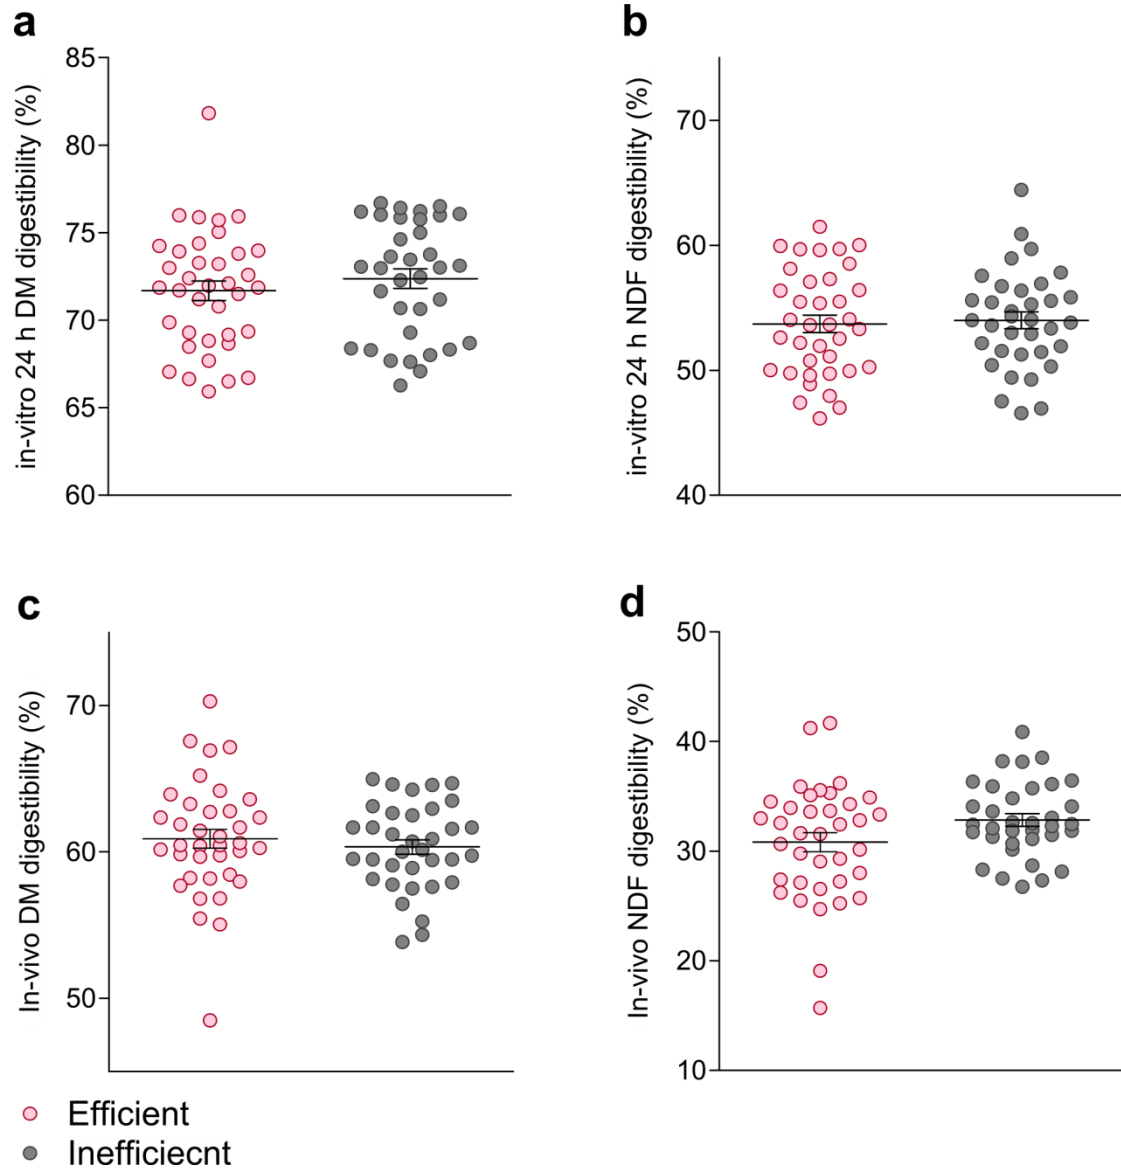

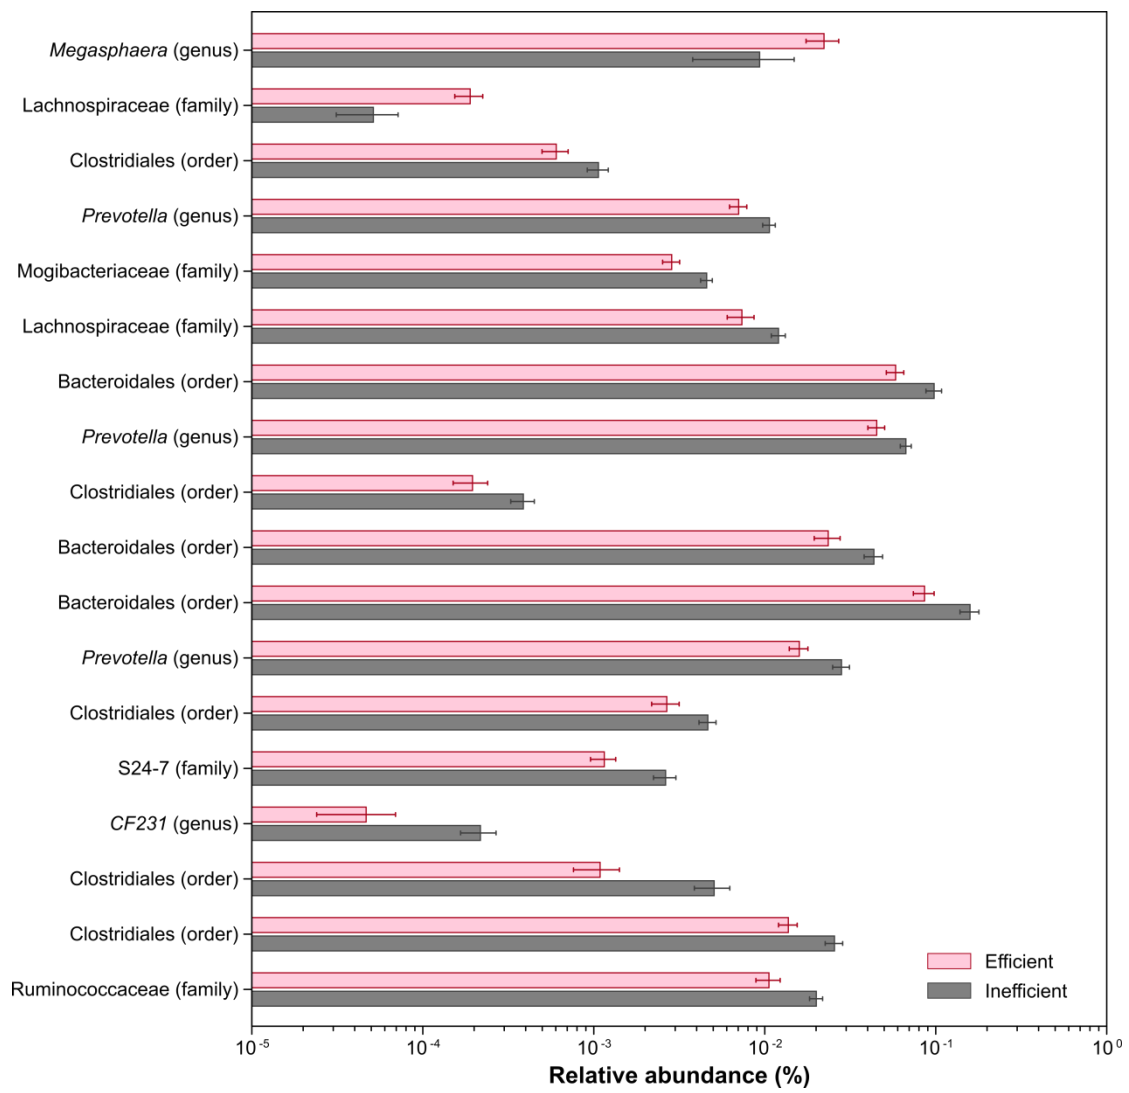

195 **Figure S12 PCoA**

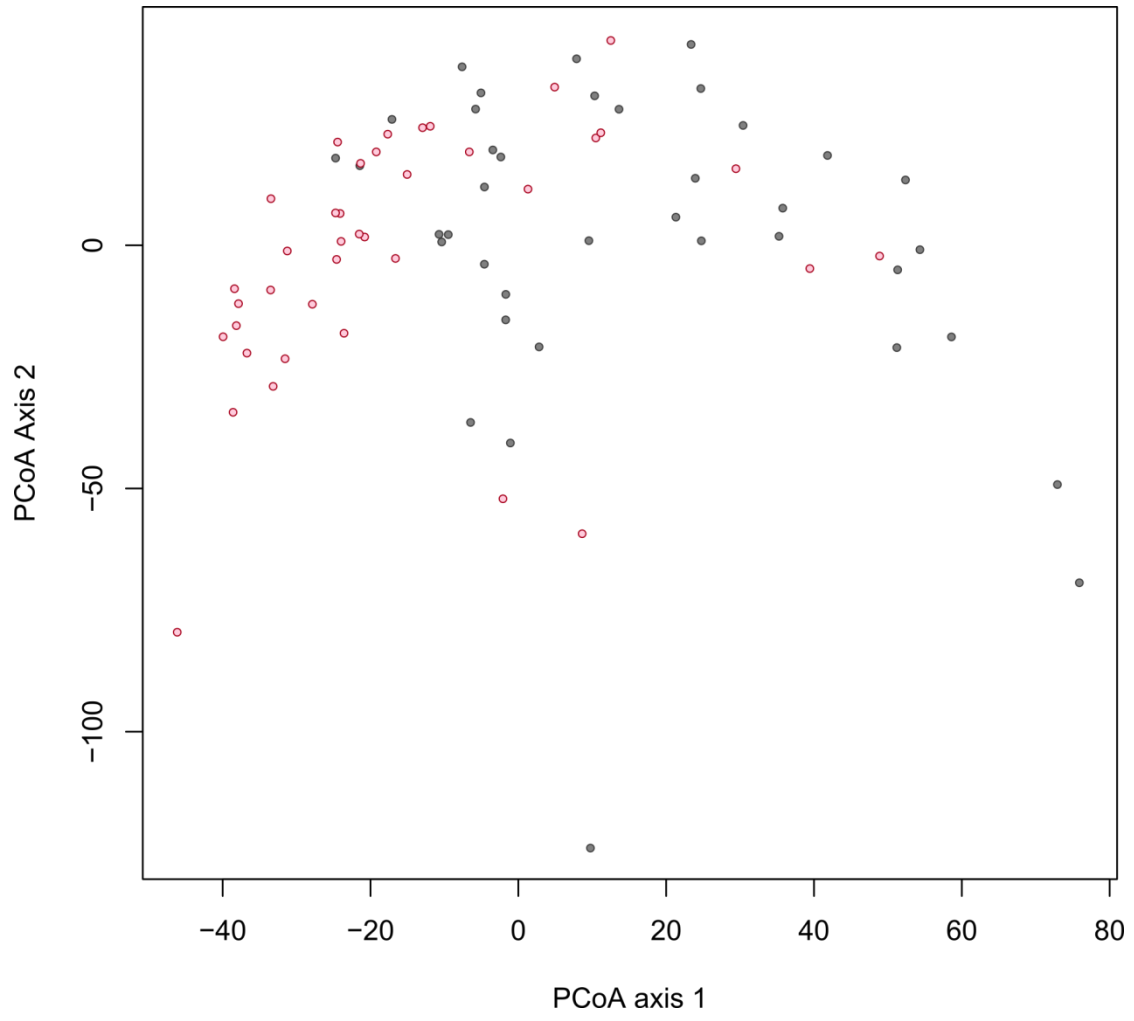

196

197

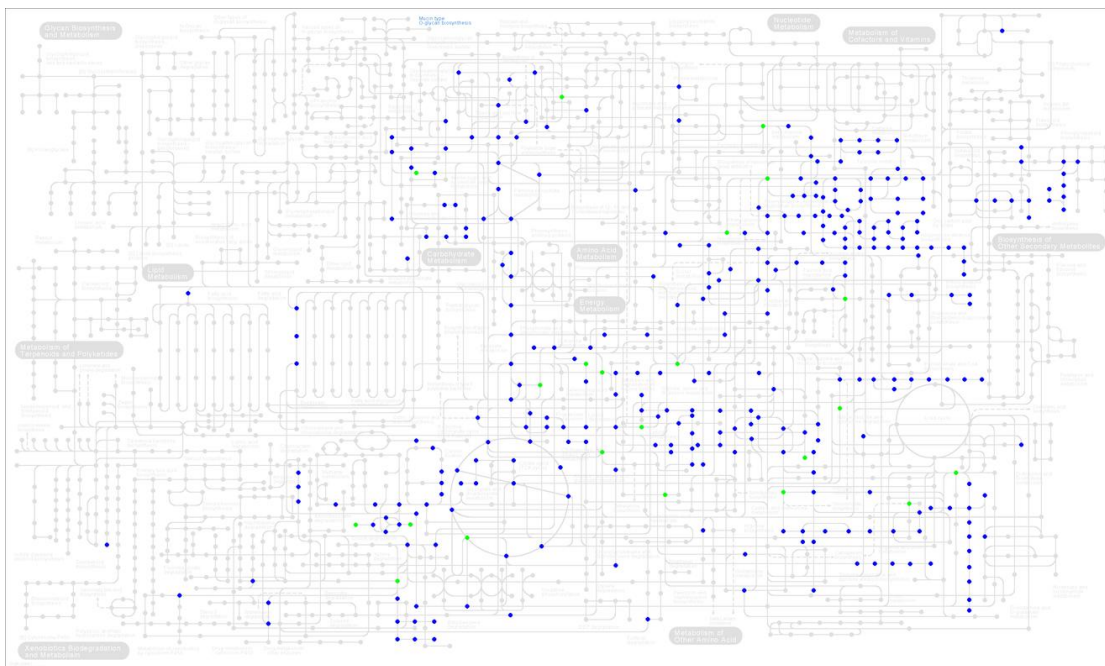

200 **Figure S14**

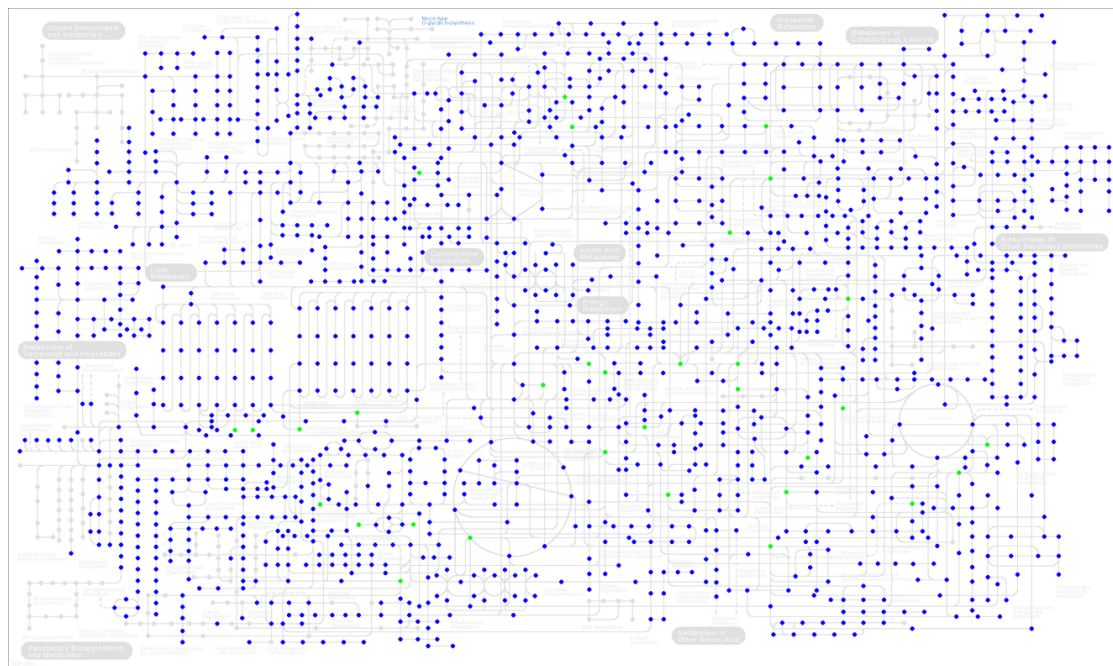

201

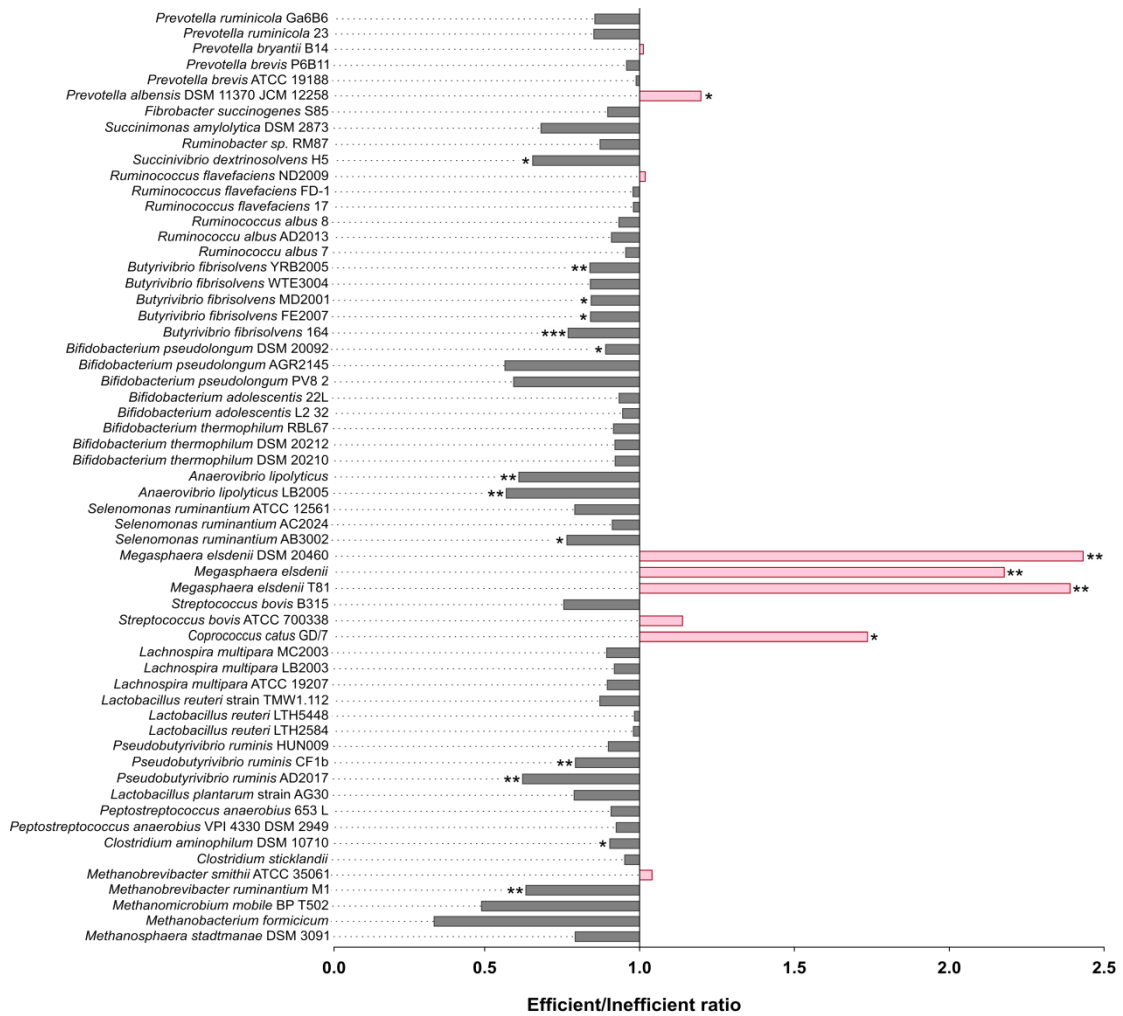

Efficient  
Inefficient

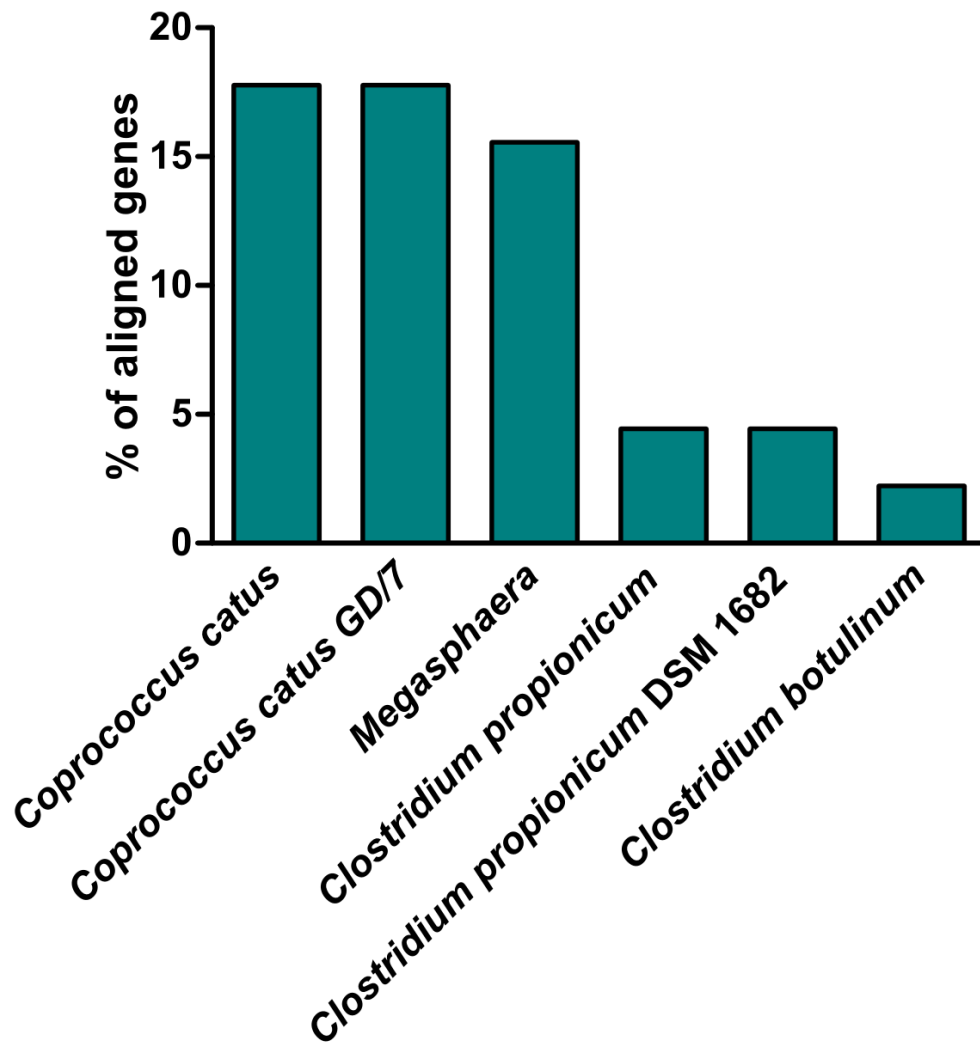

207 **Table S1**

| Acetate | Butyrate | Propionate | Valerate | Isovalerate | Lactate   | Methane   |
|---------|----------|------------|----------|-------------|-----------|-----------|
| 2.8.3.8 | 2.7.2.7  | 1.3.8.7    | 1.2.1.19 | 1.1.1.26    | 1.1.1.27  | 1.12.98.1 |
|         | 2.8.3.8  | 2.8.3.1    | 1.2.1.3  | 1.2.1.24    | 1.1.1.28  | 1.12.98.2 |
|         |          | 4.1.1.41   | 1.2.1.5  | 1.2.1.3     | 1.13.12.4 | 1.2.99.5  |
|         |          | 4.2.1.54   | 1.2.1.47 | 1.2.1.4     | 1.2.1.2   | 1.5.1     |
|         |          | 5.4.99.2   | 1.2.3.1  | 1.2.1.5     | 3.1.2.6   | 1.5.98.1  |
|         |          | 51.99.1    | 1.2.1.8  | 1.2.1.77    | 4.2.1.130 | 1.5.98.2  |
|         |          |            | 2.8.3.8  | 1.2.1.8     |           | 1.8.98.1  |
|         |          |            | 3.1.1.1  | 1.2.7.5     |           | 2.1.1.86  |
|         |          |            | 3.1.1.22 | 3.1.1.8     |           | 2.8.4.1   |
|         |          |            | 3.1.1.8  | 3.1.2.20    |           | 23.1.101  |
|         |          |            |          | 3.5.5.5     |           | 3.5.4.27  |
|         |          |            |          | 3.5.5.7     |           |           |

208

209

210



211 **Table S2**

| Diversity index           | Efficient                                       | Inefficient                                     |
|---------------------------|-------------------------------------------------|-------------------------------------------------|
| Alpha diversity species** | 5.87 ± 0.05                                     | 6.092 ± 0.03                                    |
| Alpha diversity genes**   | 14.32 ± 0.06                                    | 14.53 ± 0.028                                   |
| Dominance species*        | 0.01 ± 0.001                                    | 0.0079 ± 0.0003                                 |
| Dominance genes*          | 1.14x10 <sup>-21</sup> ± 9.72x10 <sup>-23</sup> | 0.86x10 <sup>-21</sup> ± 6.15x10 <sup>-23</sup> |

212

213

214 **Table S3**

| Metabolite  | Efficient<br>(mM) | Inefficient<br>(mM) | Efficient<br>(mM per g/L OM) | Inefficient<br>(mM per g/L OM) |
|-------------|-------------------|---------------------|------------------------------|--------------------------------|
| Acetate     | 35.61 ± 1.24      | 33.26 ± 1.55        | 11.84 ± 0.26                 | 11.1 ± 0.42                    |
| Propionate  | 22.32 ± 0.82      | 19.45 ± 0.84        | 7.45 ± 0.23 <sup>a</sup>     | 6.49 ± 0.22 <sup>b</sup>       |
| Isobutyrate | 1.5 ± 0.05        | 1.35 ± 0.06         | 0.5 ± 0.01                   | 0.45 ± 0.02                    |
| Butyrate    | 22.03 ± 1.16      | 19.6 ± 0.9          | 7.25 ± 0.27 <sup>a</sup>     | 6.52 ± 0.22 <sup>b</sup>       |
| Isovalerate | 2.94 ± 0.15       | 2.5 ± 0.13          | 0.97 ± 0.03 <sup>a</sup>     | 0.84 ± 0.04 <sup>b</sup>       |
| Valerate    | 3.75 ± 0.14       | 3.15 ± 0.14         | 1.25 ± 0.04 <sup>a</sup>     | 1.05 ± 0.04 <sup>b</sup>       |
| Total VFAs  | 88.14 ± 3.13      | 79.3 ± 3.28         | 29.26 ± 0.62 <sup>a</sup>    | 26.46 ± 0.82 <sup>b</sup>      |

215

216

217 **Table S4**

| ko number | ko description                                      |
|-----------|-----------------------------------------------------|
| 04974     | Protein digestion and absorption                    |
| 00250     | Alanine, aspartate and glutamate metabolism         |
| 00260     | Glycine, serine and threonine metabolism            |
| 00270     | Cysteine and methionine metabolism                  |
| 00290     | Valine, leucine and isoleucine biosynthesis         |
| 00300     | Lysine biosynthesis                                 |
| 00330     | Arginine and proline metabolism                     |
| 00340     | Histidine metabolism                                |
| 00350     | Tyrosine metabolism                                 |
| 00360     | Phenylalanine metabolism                            |
| 00380     | Tryptophan metabolism                               |
| 00400     | Phenylalanine, tyrosine and tryptophan biosynthesis |
| 00680     | Methane metabolism                                  |

218

219
